# Supplementary material
Source: PubMed Central journal article supplement (PMC2727482)

Supplemental Figure 1

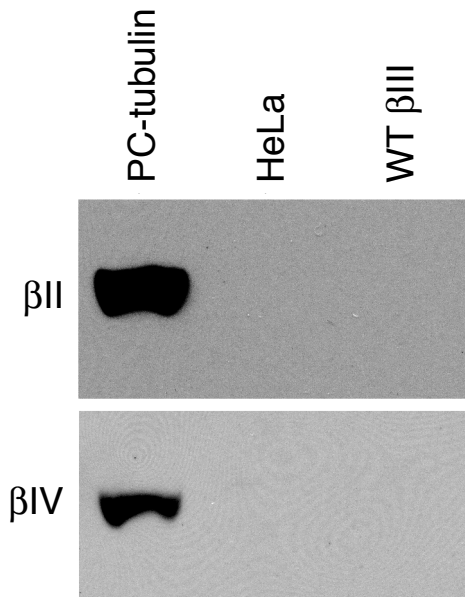

Supplement: NIHMS71405-supplement-Supplementary_Figure_1.pdf [file NIHMS71405-supplement-Supplementary_Figure_1.pdf]

## Supplemental Figure 2

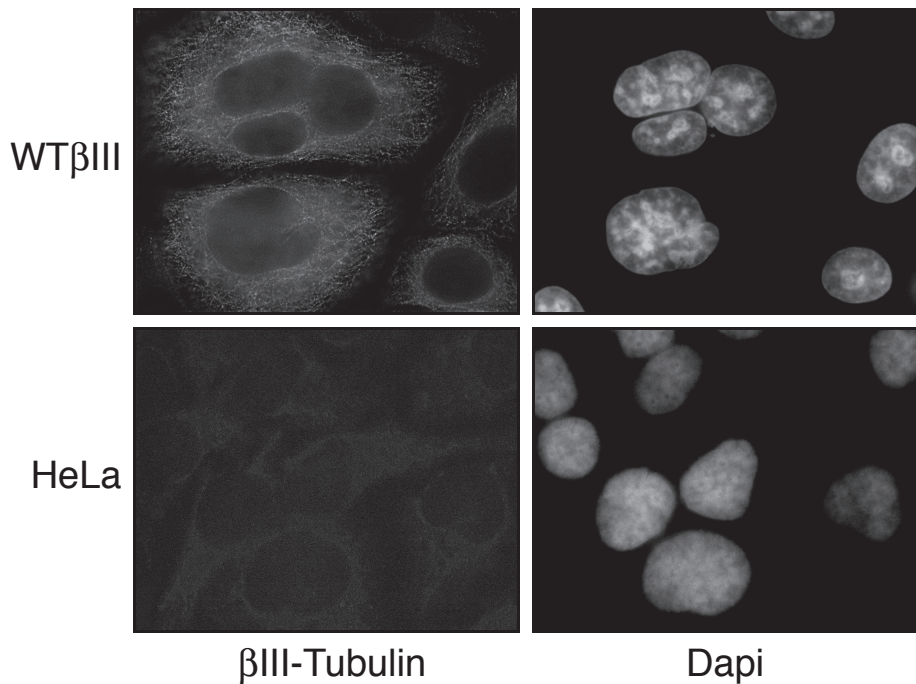

Supplement: NIHMS71405-supplement-Supplementary_Figure_2.pdf [file NIHMS71405-supplement-Supplementary_Figure_2.pdf]

**A**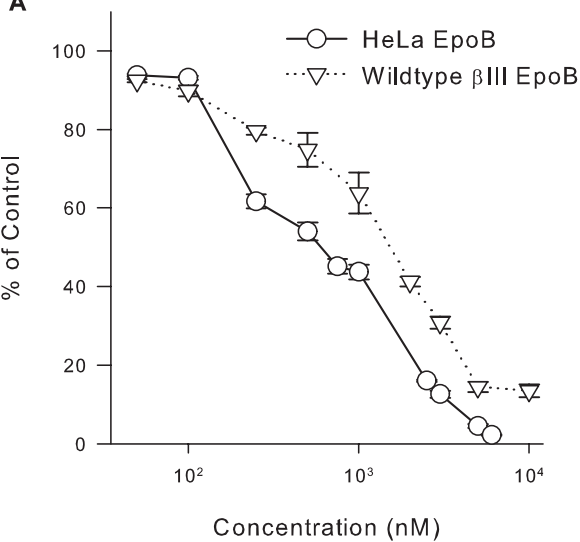**B**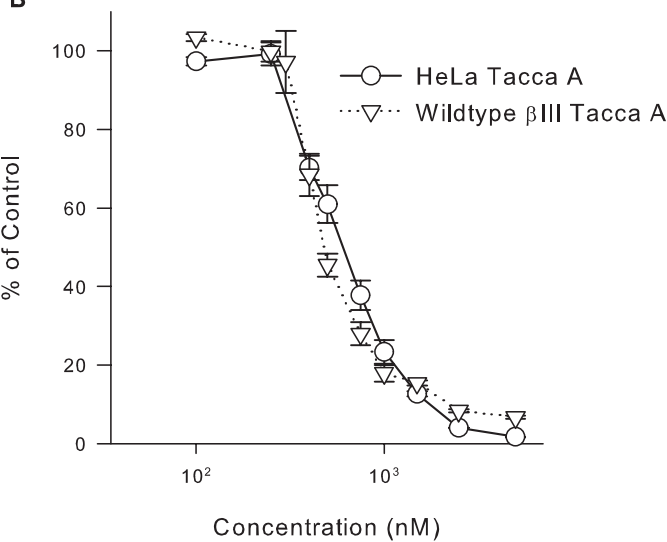**C**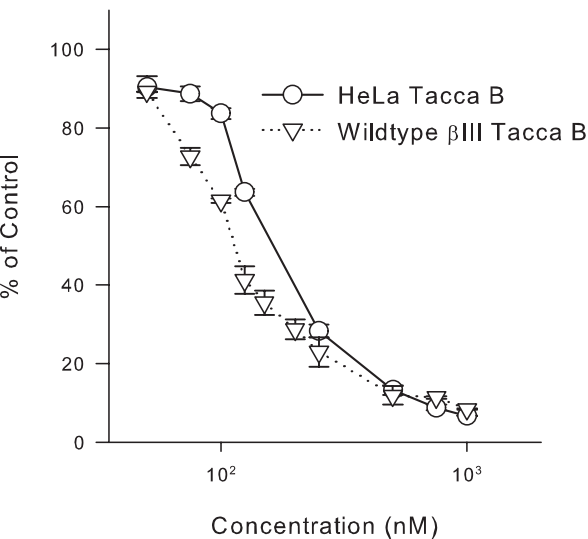

Supplement: NIHMS71405-supplement-Supplementary_Figure_3.pdf [file NIHMS71405-supplement-Supplementary_Figure_3.pdf]
